# Supplementary material
Source: PubMed Central journal article supplement (PMC4890679)
Supplement: EMS66348-supplement-Supplementary_Tables.pdf [file EMS66348-supplement-Supplementary_Tables.pdf]

### Supplementary Table 1. Demographics of the phenotyped population

| Age group                       | <18<br>years      | 18-35<br>years      | 35-50<br>years      | 50-65<br>years      | 65+<br>years        | All                 |
|---------------------------------|-------------------|---------------------|---------------------|---------------------|---------------------|---------------------|
| <i>n</i>                        | 40                | 90                  | 100                 | 123                 | 54                  | 638                 |
| <b>Physical characteristics</b> |                   |                     |                     |                     |                     |                     |
| Median age (IQR)                | 9.0<br>(4.8-12.0) | 26.0<br>(23.0-30.0) | 43.3<br>(39.1-46.1) | 58.2<br>(54.0-61.0) | 70.2<br>(68.0-75.1) | 46.0<br>(29.0-59.2) |
| Female, <i>n</i> (%)            | 23<br>(57.5%)     | 52<br>(57.8%)       | 61<br>(61.0%)       | 64<br>(52.0%)       | 22<br>(40.7%)       | 343<br>(53.8%)      |
| Male, <i>n</i> (%)              | 16<br>(40.0%)     | 38<br>(42.2%)       | 39<br>(39.0%)       | 59<br>(48.0%)       | 32<br>(59.3%)       | 268<br>(44.8%)      |
| BMI (IQR)                       | NA                | 22.0<br>(20.5-24.5) | 24.0<br>(23.0-27.0) | 25.0<br>(23.0-28.0) | 27.0<br>(25.0-29.0) | 24.0<br>(22.0-27.0) |
| BMI, <i>n</i>                   | 0                 | 43                  | 60                  | 89                  | 21                  | 213                 |
| <b>Psychological scores</b>     |                   |                     |                     |                     |                     |                     |
| Survey, <i>n</i>                | 0                 | 44                  | 58                  | 96                  | 37                  | 235                 |
| Depression (IQR)                | NA                | 1.0<br>(0.0 – 2.0)  | 1.0<br>(0.0 – 2.0)  | 2.0<br>(0.0 – 4.0)  | 5.0<br>(1.0 – 6.0)  | 1.0<br>(0.0 – 4.0)  |
| Anxiety (IQR)                   | NA                | 4.0<br>(1.0 – 4.0)  | 3.0<br>(1.0 – 5.8)  | 3.0<br>(1.0 – 6.0)  | 4.0<br>(2.0 – 6.0)  | 3.0<br>(1.0 – 6.0)  |

Phenotypic descriptors for the whole cohort and split by age groups (<18, 18-35, 35-50, 50-65, >65). Median and interquartile ranges (IQR) are shown. Values do not add up to 100% due to missing data. BMI and psychological scores were only assessed in sub-cohorts.

### Supplementary Table 2. Immune parameter definitions and summary statistics

Available as attached Excel spreadsheet

Definitions and characterisation for each immune parameter. Summary statistics for each immune parameter ( $R^2$  values,  $P$  values, 95% confidence intervals)

**Supplementary Table 3. Flow cytometry reagents**

| Target                     | Clone                 | Source       |
|----------------------------|-----------------------|--------------|
| CCR7                       | 3D12                  | eBiosciences |
| CD11c                      | 3.9                   | eBiosciences |
| CD123                      | 6H6                   | eBiosciences |
| CD14                       | 61D3                  | eBiosciences |
| CD24                       | eBioSN3 (SN3 A5-2H10) | eBiosciences |
| CD27                       | O323                  | eBiosciences |
| CD3                        | SK7                   | eBiosciences |
| CD31                       | WM-59                 | eBiosciences |
| CD38                       | HIT2                  | eBiosciences |
| CD4                        | RPA-T4                | eBiosciences |
| CD8 $\alpha$               | RPA-T8                | eBiosciences |
| CD19                       | HIB19                 | eBiosciences |
| CD45Ra                     | HI100                 | eBiosciences |
| CD56                       | MEM188                | eBiosciences |
| CXCR5                      | IgG23                 | R&D          |
| FOXP3                      | 206D                  | Biolegend    |
| $\gamma\delta$ TCR         | B1.1                  | eBiosciences |
| HLA-DR                     | LN3                   | eBiosciences |
| IFN $\gamma$               | 4S.B3                 | eBiosciences |
| IgE                        | IgE21                 | eBiosciences |
| IgM                        | MHM-88                | eBiosciences |
| IL-17                      | eBio64DEC17           | eBiosciences |
| IL-2                       | MQ1-17H12             | eBiosciences |
| IL-4                       | 8D4-8                 | eBiosciences |
| PD-1                       | eBioJ105              | eBiosciences |
| V $\alpha$ 24J $\alpha$ 18 | 6B11                  | eBiosciences |
